1                   **HERD IMMUNITY TO EBOLAVIRUSES IS NOT A**  
2                   **REALISTIC TARGET FOR CURRENT VACCINATION**  
3                   **STRATEGIES**

4  
5 Stuart G. Masterson<sup>1</sup>, Leslie Lobel<sup>2,3</sup>, Miles W. Carroll<sup>4</sup>, Mark N. Wass<sup>1\*</sup>, Martin  
6 Michaelis<sup>1\*</sup>

7  
8 <sup>1</sup> Industrial Biotechnology Centre and School of Biosciences, University of Kent, Canterbury,  
9 UK

10 <sup>2</sup> Department of Microbiology, Immunology and Genetics, Faculty of Health Sciences, Ben-  
11 Gurion University of the Negev, Beer-Sheva, Israel

12 <sup>3</sup> Department of Emerging and Re-emerging Diseases and Special Pathogens Uganda Virus  
13 Research Institute (UVRI), Entebbe, Uganda

14 <sup>4</sup> Public Health England, Porton Down, Salisbury, United Kingdom (M.W. Carroll)

15  
16 \* Correspondence: Mark N. Wass, [M.N.Wass@kent.ac.uk](mailto:M.N.Wass@kent.ac.uk); Martin Michaelis,  
17 [M.Michaelis@kent.ac.uk](mailto:M.Michaelis@kent.ac.uk)

18  
19 **Word count:** 1998

20 **Figures:** 2

21 **Tables:** 0

22 **Abstract**

23 The recent West African Ebola virus pandemic, which affected >28,000 individuals increased  
24 interest in anti-Ebolavirus vaccination programs. Here, we systematically analyzed the  
25 requirements for a prophylactic vaccination program based on the basic reproductive number  
26 ( $R_0$ , i.e. the number of secondary cases that result from an individual infection). Published  $R_0$   
27 values were determined by a systematic literature research and ranged from 0.37 to 20.  $R_0$ s  
28  $\geq 4$  realistically reflected the critical early outbreak phases and superspreading events. Based  
29 on the  $R_0$ , the herd immunity threshold ( $I_c$ ) was calculated using the equation  $I_c=1-(1/R_0)$ .  
30 The critical vaccination coverage ( $V_c$ ) needed to provide herd immunity was determined by  
31 including the vaccine effectiveness ( $E$ ) using the equation  $V_c=I_c/E$ . At an  $R_0$  of 4, the  $I_c$  is  
32 75% and at an  $E$  of 90%, more than 80% of a population need to be vaccinated to establish  
33 herd immunity. Such vaccination rates are currently unrealistic because of resistance against  
34 vaccinations, financial/ logistical challenges, and a lack of vaccines that provide long-term  
35 protection against all human-pathogenic Ebolaviruses. Hence, outbreak management will for  
36 the foreseeable future depend on surveillance and case isolation. Clinical vaccine candidates  
37 are only available for Ebola viruses. Their use will need to be focused on health care workers,  
38 potentially in combination with ring vaccination approaches.

39  
40 **Key words:** Ebola virus; Ebolavirus; Vaccines; Herd immunity; Basic Reproduction Number

41 **Introduction**

42 Four Ebolaviruses (Ebola virus, Sudan virus, Bundybugyo virus, Tai Forrest virus) are  
43 endemic to Africa and can cause severe disease associated humans (1). Reston viruses are  
44 endemic to Asia and considered to be non-pathogenic in humans (1). However, very few  
45 genetic changes may result in human-pathogenic Reston viruses (1-3). Since the discovery of  
46 the first two members of the *Ebolavirus* family in 1976 in Sudan (today South Sudan) and  
47 Zaïre (today Democratic Republic of Congo), Ebolaviruses had until 2013 only caused small  
48 outbreaks in humans affecting up to a few hundred individuals (4,5). The recent Ebola virus  
49 outbreak in West Africa (2013-2016) resulted in 28,616 confirmed, probable, and suspected  
50 cases of Ebola virus disease and 11,310 deaths (5), which may still underestimate the actual  
51 numbers (6). It was the first Ebolavirus outbreak that affected multiple countries, was  
52 introduced to another country via air travel, and resulted in disease cases outside of Africa  
53 (4,5). The outbreak emphasized the health threats posed by Ebolaviruses and the importance  
54 of protection strategies (5,6).

55

56 Vaccination programs are effective in controlling infectious diseases, as demonstrated by the  
57 WHO-driven smallpox eradication (7). However, eradication seems to be an unrealistic aim  
58 for zoonotic viruses like the Ebolaviruses that circulate in animal reservoirs (8). Only herd  
59 immunity could prevent future outbreaks and protect individuals that cannot be vaccinated  
60 due to health issues (7). The herd immunity threshold ( $I_c$ ) describes the number of society  
61 members that need to be protected ( $I$ ) to prevent outbreaks. It is based on the basic  
62 reproductive number  $R_0$  (number of secondary cases caused per primary case) of a pathogen  
63 (9-13).

64

65 Here, we performed a systematic analysis to determine the critical vaccine coverage ( $V_c$ )  
66 required to prevent Ebolavirus outbreaks by a prophylactic mass vaccination program based  
67 on the  $R_0$  associated with Ebolavirus infection in humans. The results were further critically  
68 considered in the context of 1) the status of current Ebolavirus vaccine candidates and 2) the  
69 feasibility of a large-scale prophylactic Ebolavirus vaccination program taking into account  
70 a) the preparedness to participate in vaccination programs in the affected societies, b) logistic  
71 challenges, and c) costs.

72 **Methods**

73

74 **Ebolavirus nomenclature**

75 The nomenclature in this manuscript follows the recommendations of Kuhn et al. (14). The  
76 genus is *Ebolavirus*. The species are *Zaire ebolavirus* (type virus: Ebola virus), *Sudan*  
77 *ebolavirus* (type virus: Sudan virus), *Bundibugyo ebolavirus* (type virus: Bundibugyo virus),  
78 and *Tai Forest ebolavirus* (type virus: Tai Forest virus).

79

80 **Identification of studies that report on the basic reproductive number ( $R_0$ ) of**  
81 **Ebolaviruses**

82 To identify scientific articles that have calculated the basic reproductive number ( $R_0$ ) for  
83 Ebolaviruses, we performed a literature search using PubMed  
84 ([www.ncbi.nlm.nih.gov/pubmed](http://www.ncbi.nlm.nih.gov/pubmed)) for the search term combinations “Ebola  $R_0$ ”, “Ebola basic  
85 reproductive number”, and “Ebola basic reproduction number” (retrieved on 29<sup>th</sup> September  
86 2017).

87

88 **Determination of herd immunity thresholds and their implications for Ebolavirus**  
89 **diseases prevention strategies**

90 Based on the basic reproductive number  $R_0$ , i.e. the number of secondary cases that result  
91 from an individual infection, the herd immunity threshold ( $I_c$ ) was calculated using equation  
92 1

93

$$I_c = 1 - (1/R_0) \quad (\text{eqn 1})$$

94

95 where  $I_c$  indicates the proportion of a society that needs to be protected from infection to  
96 achieve herd immunity. Next, the critical vaccination coverage ( $V_c$ ) that is needed to provide  
97 herd immunity was determined by including the vaccine effectiveness ( $E$ ) using equation 2

98

$$V_c = I_c / E = [1 - (1/R_0)] / E \quad (\text{eqn 2})$$

99

(9-13).

100

101

## 102 **Results**

103

### 104 **Basic reproductive number ( $R_0$ ) values for Ebolaviruses**

105 The PubMed search for “Ebola  $R_0$ ” provided 18 hits, the search for “Ebola basic  
106 reproductive number” provided 42 hits, and the search for “Ebola basic reproduction  
107 number” provided 35 hits (Figure 1; Data Sheet 1). After removal of the overlaps and  
108 inclusion of an additional article (identified from the reference list of (12)) this resulted in 51  
109 articles, 35 of which provided relevant information on Ebolavirus  $R_0$  values (Figure 1; Data  
110 Sheet 1).

111

112  $R_0$  data were only available for Ebola virus and Sudan virus outbreaks. (Data Sheet 1). 29/35  
113 studies analyzed data from the recent West African Ebola virus outbreak (Data Sheet 1). The  
114 others reported on Ebola virus outbreaks in the Democratic Republic of Congo. Four studies  
115 also included data from the Sudan virus outbreak 2000/2001 in Gulu, Uganda. We also  
116 considered a review that summarized all available data until February 2015 (4) (Data Sheet  
117 1).

118

119  $R_0$  indicates the number of new infections caused by an infected individual, and when greater  
120 than 1 an outbreak will spread.  $R_0$ s ranged from 0.36 to 12 for Ebola virus and from 1.34 to  
121 3.54 for Sudan virus (Data Sheet 1). Three studies directly compared the Ebola virus outbreak  
122 in Kikwit (1995, DR Congo) and the Sudan virus outbreak in Gulu (2000/ 2001, Uganda)  
123 (15-17), but did not reveal fundamental differences between the  $R_0$ s (Data Sheet 1, Data  
124 Sheet 2).

125

126 Different approaches to calculate  $R_0$ s lead to varying results (13). Accordantly,  $R_0$  values  
127 calculated for the Sudan virus outbreak 2000/ 2001 in Gulu using identical data ranged from  
128 1.34 to 3.54 (Data Sheet 1, Data Sheet 2). Additionally, virus transmission is influenced by  
129 socio-economic and behavioral factors including the health care response, society  
130 perceptions, religious practices, population density, and/ or infrastructure (13,18).  
131 Concordantly,  $R_0$ s determined in different districts of Guinea, Liberia, and Sierra Leone  
132 during the West African Ebola virus epidemic ranged from 0.36 to 3.37 (19). High  
133 reproductive numbers ( $\geq 4$ ) are typically observed at the beginning of Ebolavirus outbreaks,  
134 prior to the implementation of control measures (20-23). Also, the spread of Ebolaviruses  
135 may be substantially driven by “superspreaders” who infect a high number (up to 15-20) of  
136 individuals (18,24-27). Hence, a vaccination program should establish herd immunity against  
137 Ebolaviruses that spread with an  $R_0$  of  $\geq 4$ .

138

### 139 **Herd immunity threshold ( $I_c$ )**

140 At an  $R_0$  of 4, the  $I_c$  (eqn 1) is 75%, which means that 75% of a population need to be  
141 immune to provide herd immunity (Figure 2A, Data Sheet 3). The  $I_c$  further rises to 80% at  
142 an  $R_0$  of 5, to 90% at an  $R_0$  of 10, and to 95%  $R_0$  of 20 (Figure 2A, Data Sheet 3). This shows  
143 that high proportions of a population need to be immune to establish effective herd immunity.  
144

144

### 145 **Critical vaccine coverage ( $V_c$ )**

146 As there is currently no approved vaccine for the prevention of Ebolavirus disease, we  
147 calculated a range of  $V_c$  (eqn 2) scenarios that reflect the efficacy range covered by approved  
148 vaccines. Attenuated replication-competent measles virus vaccines have been reported to  
149 protect up to 95% of individuals from disease after one dose, which increased to up to 99%  
150 after a second dose (28). The efficacy of varicella zoster virus vaccines, another attenuated

151 replication-competent vaccine, was recently calculated to be 81.9% after one dose and 94.4%  
152 after two doses (29). Inactivated seasonal influenza virus split vaccines have been reported to  
153 have a substantially lower efficiency of 50-60% (30-32). Hence, we considered a  $V_c$  range  
154 between 50% and 100% (Figure 2B, Data Sheet 3). Vaccines, which provide high protection  
155 (ideally after a single vaccination), and high vaccination rates are required to prevent  
156 Ebolavirus outbreaks. If we assume an  $R_0$  of 4 and a vaccination efficacy  $E$  of 90%, more  
157 than 80% of a population need to be vaccinated to establish herd immunity. If the  $R_0$  rises to  
158 5 a vaccine coverage of 80% would be required, even if a vaccine with 100% efficacy was  
159 available (Figure 2B, Data Sheet 3).  
160

## 161 Discussion

162

163 We performed an analysis of the Ebolavirus vaccine requirements to achieve the  $V_c$  needed  
164 for prophylactic mass vaccination programs. Vaccines need to prevent Ebolavirus outbreaks  
165 that spread at an  $R_0 \geq 4$ , which reflects the critical early outbreak phases prior to the  
166 implementation of control measures and superspreading events (18-27). At an  $R_0$  of 4, 80%  
167 of individuals need to be vaccinated with a vaccination efficacy of 90% to achieve herd  
168 immunity. Hence, highly effective vaccines and a high vaccination coverage are essential for  
169 successful prophylactic mass vaccination programs against Ebolaviruses.

170

171 Clinical vaccine candidates providing protection against all three to four human-pathogenic  
172 Ebolaviruses (Ebola virus, Sudan virus, Bundibugyo virus, potentially Tai Forest virus) do  
173 not currently exist (Data Sheet 4), although pre-clinical data suggest that the development of  
174 such vaccines may be feasible (5). Current vaccine candidates may also not provide the long-  
175 term protective immunity ( $\geq 10$  years) necessary for sustainable protection against spillover  
176 events from animal reservoirs. Two studies reported immune responses 12 months after  
177 vaccination with different Ebola virus vaccine candidates (34,35). One of them described  
178 seroconversion in  $>90\%$  of individuals after a single injection of rVSV-ZEBOV, a vesicular  
179 stomatitis virus-based Ebola virus vaccine. No or only a minor drop in antibody titers and  
180 neutralization capacity was reported 360 days after vaccination (34). A study investigating  
181 rVSV-ZEBOV and ChAd3-EBO-Z, a chimpanzee adenovirus type-3 vector-based Ebola  
182 virus vaccine, found lower seroconversion rates (rVSV-ZEBOV: 83.7%; ChAd3-EBO-Z:  
183 70.8%) and reported the highest antibody response after one month and a decline afterwards  
184 (35). Thus, it is not clear, whether the vaccine-induced immunity covers the time frames  $>18$   
185 months that Ebolavirus survivors may remain contagious for (5,34,35,38-42). Notably,  
186 antibody responses may not always reliably indicate the protective efficacy of vaccines  
187 (36,37) (L. Lobel, unpublished data). Ebola virus recurrences and reinfections indicate that  
188 also natural Ebolavirus infections may not necessarily provide sustained protective immunity,  
189 which may further complicate the development of vaccines that provide long-term protection  
190 (43,44).

191

192 Limited acceptance of vaccinations may also limit Ebolavirus vaccination programs. In a  
193 rVSV-ZEBOV ring vaccination trial, only 5,837/ 11,841 patient contacts could be vaccinated.  
194 34% of the contacts refused the vaccination (45). In a survey in Sierra Leone during the West  
195 African Ebola epidemic, 106/ 400 respondents (26.6%) were prepared to pay for a  
196 vaccination, while 290 respondents (72.5%) would have accepted a free vaccination (46).  
197 Hence, a  $I_c$  of 75% (necessary to prevent an outbreak that spreads with an  $R_0=4$  (Data Sheet  
198 3)) would not be achievable, even under the threat of an ongoing epidemic.

199

200 The median maximum fee that survey participants in Sierra Leone during the West African  
201 Ebola epidemic were prepared to pay for a vaccine was about 5,000 leones (\$0.65 as of 11th  
202 January 2018) (46). The international organization GAVI ([www.gavi.org](http://www.gavi.org)) is providing \$5  
203 million for the development of rVSV-ZEBOV, which is expected to pay for 300,000 vaccine  
204 doses (about \$16.70/ dose) (47). Within a rVSV-ZEBOV ring vaccination trial, 11,841  
205 contacts requiring vaccination from 117 clusters were identified over a ten-month period, i.e.  
206 about 101 individuals per confirmed Ebola virus disease patient (45). Hence, 300,000 doses  
207 will enable to vaccinate the contacts of approximately 2,970 Ebola virus disease patients. If  
208 an effective vaccine (which provided protection against all human-pathogenic Ebolaviruses)  
209 was available, a vaccination program would comprise about 462 million individuals in the  
210 countries that have been affected by Ebolavirus outbreaks (Data Sheet 5). Notably, the

211 countries, which have been affected by Ebolavirus outbreaks so far, have large rural  
212 populations ranging from 13% (Gabon) to 84% (Uganda) (Data Sheet 5). Vaccination  
213 programs in rural areas are associated with logistical issues including transport difficulties,  
214 lack of equipment and trained medical specialists, and cultural and language barriers (48,49).  
215

216 In conclusion, the achievement of a  $V_c$  of 75% that is necessary to prevent an outbreak that  
217 spreads with an  $R_0$  of 4 with a vaccine that has an efficacy of 100% is currently unrealistic  
218 because of limited vaccine acceptance in the affected populations and because of financial  
219 and logistical challenges. In addition, concurrent diseases such as HIV and cancer, along with  
220 potential side effects of vaccination, may remove significant numbers of potential vaccinees  
221 (5,50). Moreover, vaccines that provide long-term immunity against all three (or including  
222 Tai Forest virus, four) human-pathogenic Ebolaviruses, which would be needed to protect  
223 populations effectively from large Ebolavirus outbreaks in endemic areas, do not exist.  
224 Therefore, outbreak control of Ebolaviruses will for the foreseeable future depend on  
225 surveillance and the isolation of cases. Clinical vaccine candidates are only available for  
226 Ebola viruses and will need to be focused on health care workers, who are often involved in  
227 disease transmission (22), potentially in combination with the vaccination of patient contacts.



## 228 **References**

- 229 1. Michaelis M, Rossman JS, Wass, M.N. Computational analysis of Ebolavirus data:  
230 prospects, promises and challenges. *Biochem Soc Trans* (2016) 44:973-8.
- 231 2. Pappalardo M, Juliá M, Howard MJ, Rossman JS, Michaelis M, Wass MN. Conserved  
232 differences in protein sequence determine the human pathogenicity of Ebolaviruses. *Sci Rep*  
233 (2016) 6:23743. doi:10.1038/srep23743
- 234 3. Pappalardo M, Reddin IG, Cantoni D, Rossman JS, Michaelis M, Wass MN. Changes  
235 associated with Ebola virus adaptation to novel species. *Bioinformatics* (2017) 33:1911-5.
- 236 4. Van Kerkhove MD, Bento AI, Mills HL, Ferguson NM, Donnelly CA. A review of  
237 epidemiological parameters from Ebola outbreaks to inform early public health decision-  
238 making. *Sci Data* (2015) 2:150019. doi: 10.1038/sdata.2015.19
- 239 5. Keshwara R, Johnson RF, Schnell MJ. Toward an Effective Ebola Virus Vaccine. *Annu*  
240 *Rev Med* (2017) 68:371-86.
- 241 6. Rojek A, Horby P, Dunning J. Insights from clinical research completed during the west  
242 Africa Ebola virus disease epidemic. *Lancet Infect Dis* (2017) 17:e280-e292.
- 243 7. Bonanni P, Sacco C, Donato R, Capei R. Lifelong vaccination as a key disease-prevention  
244 strategy. *Clin Microbiol Infect* (2014) 20(Suppl 5):32-6.
- 245 8. Judson SD, Fischer R, Judson A, Munster VJ. Ecological Contexts of Index Cases and  
246 Spillover Events of Different Ebolaviruses. *PLoS Pathog* (2016) 12:e1005780.  
247 doi:10.1371/journal.ppat.1005780
- 248 9. Anderson RM. The concept of herd immunity and the design of community based  
249 immunization programs. *Vaccine* (1992): 10:928-35.
- 250 10. Fine P, Eames K, Heymann DL. "Herd immunity": a rough guide. *Clin Infect Dis* (2011)  
251 52:911-6.
- 252 11. Plans-Rubió P. The vaccination coverage required to establish herd immunity against  
253 influenza viruses. *Prev Med* (2012) 55:72-7.
- 254 12. Gittings K, Matson KL. Establishing herd immunity against Ebola through vaccination.  
255 *Vaccine* (2016) 34:2644-7.
- 256 13. Guerra FM, Bolotin S, Lim G, Heffernan J, Deeks SL, Li Y, et al. The basic reproduction  
257 number (R0) of measles: a systematic review. *Lancet Infect Dis* (2017) 17:e420-e428.
- 258 14. Kuhn JH, Becker S, Ebihara H, Geisbert TW, Johnson KM, Kawaoka Y, et al. Proposal  
259 for a revised taxonomy of the family Filoviridae: classification, names of taxa and viruses,  
260 and virus abbreviations. *Arch Virol* (2010) 155:2083-103.
- 261 15. Chowell G, Hengartner NW, Castillo-Chavez C, Fenimore PW, Hyman JM. The basic  
262 reproductive number of Ebola and the effects of public health measures: the cases of Congo  
263 and Uganda. *J Theor Biol* (2004) 229:119-26.
- 264 16. Legrand J, Grais RF, Boelle PY, Valleron AJ, Flahault A. Understanding the dynamics of  
265 Ebola epidemics. *Epidemiol Infect* (2007) 135:610-21.
- 266 17. Chen T, Ka-Kit Leung R, Liu R, Chen F, Zhang X, Zhao J, et al. Risk of imported Ebola  
267 virus disease in China. *Travel Med Infect Dis* (2014) 12:650-8.
- 268 18. Skrip LA, Fallah MP, Gaffney SG, Yaari R, Yamin D, Huppert A, et al. Characterizing  
269 risk of Ebola transmission based on frequency and type of case-contact exposures. *Philos*  
270 *Trans R Soc Lond B Biol Sci* (2017) 372(1721). pii: 20160301. doi:10.1098/rstb.2016.0301
- 271 19. Krauer F, Gsteiger S, Low N, Hansen CH, Althaus CL. Heterogeneity in District-Level  
272 Transmission of Ebola Virus Disease during the 2013-2015 Epidemic in West Africa. *PLoS*  
273 *Negl Trop Dis* (2016); 10:e0004867. doi:10.1371/journal.pntd.0004867
- 274 20. Althaus CL. Rapid drop in the reproduction number during the Ebola outbreak in the  
275 Democratic Republic of Congo. *PeerJ* (2015) 3:e1418. doi:10.7717/peerj.1418
- 276 21. Althaus CL, Low N, Musa EO, Shuaib F, Gsteiger S. Ebola virus disease outbreak in  
277 Nigeria: Transmission dynamics and rapid control. *Epidemics* (2015) 11:80-4.

- 278 22. Rosello A, Mossoko M, Flasche S, Van Hoek AJ, Mbala P, Camacho A, et al. Ebola virus  
279 disease in the Democratic Republic of the Congo, 1976-2014. *Elife* (2015) 4. pii: e09015.  
280 doi:10.7554/eLife.09015
- 281 23. Kucharski AJ, Eggo RM, Watson CH, Camacho A, Funk S, Edmunds WJ. Effectiveness  
282 of Ring Vaccination as Control Strategy for Ebola Virus Disease. *Emerg Infect Dis* (2016)  
283 22:105-8.
- 284 24. Volz E, Pong S. Phylodynamic analysis of ebola virus in the 2014 sierra leone epidemic.  
285 *PLoS Curr.* 2014;6. pii: ecurrents.outbreaks.6f7025f1271821d4c815385b08f5f80e.  
286 doi:10.1371/currents.outbreaks.6f7025f1271821d4c815385b08f5f80e
- 287 25. Osterholm MT, Moore KA, Kelley NS, Brosseau LM, Wong G, Murphy FA, et al.  
288 Transmission of Ebola viruses: what we know and what we do not know. *MBio* (2015)  
289 6:e00137. doi:10.1128/mBio.00137-15
- 290 26. Althaus CL. Ebola superspreading. *Lancet Infect Dis.* (2015) 15:507-8.
- 291 27. Lau MS, Dalziel BD, Funk S, McClelland A, Tiffany A, Riley S, et al. Spatial and  
292 temporal dynamics of superspreading events in the 2014-2015 West Africa Ebola epidemic.  
293 *Proc Natl Acad Sci U S A* (2017) 114:2337-42.
- 294 28. Holzmann H, Hengel H, Tenbusch M, Doerr HW. Eradication of measles: remaining  
295 challenges. *Med Microbiol Immunol* (2016) 205:201-8.
- 296 29. Rieck T, Feig M, An der Heiden M, Siedler A, Wichmann O. Assessing varicella vaccine  
297 effectiveness and its influencing factors using health insurance claims data, Germany, 2006 to  
298 2015. *Euro Surveill* (2017) 22. pii: 30521. doi:10.2807/1560-7917.ES.2017.22.17.30521
- 299 30. Beyer WE, Nauta JJ, Palache AM, Giezeman KM, Osterhaus AD. Immunogenicity and  
300 safety of inactivated influenza vaccines in primed populations: a systematic literature review  
301 and meta-analysis. *Vaccine.* (2011) 29:5785-92.
- 302 31. Osterholm MT, Kelley NS, Sommer A, Belongia EA. Efficacy and effectiveness of  
303 influenza vaccines: a systematic review and meta-analysis. *Lancet Infect Dis* (2012) 12:36-  
304 44.
- 305 32. Tricco AC, Chit A, Soobiah C, Hallett D, Meier G, Chen MH, et al. Comparing influenza  
306 vaccine efficacy against mismatched and matched strains: a systematic review and meta-  
307 analysis. *BMC Med* (2013) 11:153. doi:10.1186/1741-7015-11-153
- 308 33. Ledgerwood JE, Costner P, Desai N, Holman L, Enama ME, Yamshchikov G, et al. A  
309 replication defective recombinant Ad5 vaccine expressing Ebola virus GP is safe and  
310 immunogenic in healthy adults. *Vaccine* (2010) 29:304-13.
- 311 34. Heppner DG Jr, Kemp TL, Martin BK, Ramsey WJ, Nichols R, Dasen EJ, et al. Safety  
312 and immunogenicity of the rVSVΔG-ZEBOV-GP Ebola virus vaccine candidate in healthy  
313 adults: a phase 1b randomised, multicentre, double-blind, placebo-controlled, dose-response  
314 study. *Lancet Infect Dis* (2017) 17:854-66.
- 315 35. Kennedy SB, Bolay F, Kieh M, Grandits G, Badio M, Ballou R, et al. Phase 2 Placebo-  
316 Controlled Trial of Two Vaccines to Prevent Ebola in Liberia. *N Engl J Med* (2017)  
317 377:1438-47.
- 318 36. Dorigo-Zetsma JW, Leverstein-van Hall MA, Vreeswijk J, de Vries JJ, Vossen AC, Ten  
319 Hulscher HI, et al. Immune status of health care workers to measles virus: evaluation of  
320 protective titers in four measles IgG EIAs. *J Clin Virol* (2015) 69:214-8.
- 321 37. Hahné SJ, Nic Lochlainn LM, van Burgel ND, Kerkhof J, Sane J, Yap KB, et al. Measles  
322 Outbreak Among Previously Immunized Healthcare Workers, the Netherlands, 2014. *J Infect*  
323 *Dis* (2016) 214:1980-6.
- 324 38. Diallo B, Sissoko D, Loman NJ, Bah HA, Bah H, Worrell MC, et al. Resurgence of Ebola  
325 Virus Disease in Guinea Linked to a Survivor With Virus Persistence in Seminal Fluid for  
326 More Than 500 Days. *Clin Infect Dis* (2016) 63:1353-6.

- 327 39. Sissoko D, Duraffour S, Kerber R, Kolie JS, Beavogui AH, Camara AM, et al.  
328 Persistence and clearance of Ebola virus RNA from seminal fluid of Ebola virus disease  
329 survivors: a longitudinal analysis and modelling study. *Lancet Glob Health* (2017) 5:e80-e88.  
330 40. Li JX, Hou LH, Meng FY, Wu SP, Hu YM, Liang Q, et al. Immunity duration of a  
331 recombinant adenovirus type-5 vector-based Ebola vaccine and a homologous prime-boost  
332 immunisation in healthy adults in China: final report of a randomised, double-blind, placebo-  
333 controlled, phase 1 trial. *Lancet Glob Health* (2017) 5:e324-34.  
334 41. Winslow RL, Milligan ID, Voysey M, Luhn K, Shukarev G, Douoguih M, et al. Immune  
335 Responses to Novel Adenovirus Type 26 and Modified Vaccinia Virus Ankara-Vectored  
336 Ebola Vaccines at 1 Year. *JAMA* (2017) 317:1075-7.  
337 42. Zhu FC, Wurie AH, Hou LH, Liang Q, Li YH, Russell JB, et al. Safety and  
338 immunogenicity of a recombinant adenovirus type-5 vector-based Ebola vaccine in healthy  
339 adults in Sierra Leone: a single-centre, randomised, double-blind, placebo-controlled, phase 2  
340 trial. *Lancet* (2017) 389:621-8.  
341 43. Jacobs M, Rodger A, Bell DJ, Bhagani S, Cropley I, Filipe A, et al. Late Ebola virus  
342 relapse causing meningoencephalitis: a case report. *Lancet* (2016) 388:498-503.  
343 44. MacIntyre CR, Chughtai AA. Recurrence and reinfection--a new paradigm for the  
344 management of Ebola virus disease. *Int J Infect Dis* (2016) 43:58-61.  
345 45. Henao-Restrepo AM, Camacho A, Longini IM, Watson CH, Edmunds WJ, Egger M, et  
346 al. Efficacy and effectiveness of an rVSV-vectored vaccine in preventing Ebola virus disease:  
347 final results from the Guinea ring vaccination, open-label, cluster-randomised trial (Ebola Ça  
348 Suffit!). *Lancet* (2017) 389:505-18.  
349 46. Huo X, Shi G, Li X, Lai X, Deng L, Xu F, et al. Knowledge and attitudes about Ebola  
350 vaccine among the general population in Sierra Leone. *Vaccine* (2016) 34:1767-72.  
351 47. Henao-Restrepo AM, Preziosi MP, Wood D, Moorthy V, Kieny MP; WHO Ebola  
352 Research, Development Team. On a path to accelerate access to Ebola vaccines: The WHO's  
353 research and development efforts during the 2014-2016 Ebola epidemic in West Africa. *Curr  
354 Opin Virol* (2016) 17:138-44.  
355 48. Alexander KA, Sanderson CE, Marathe M, Lewis BL, Rivers CM, Shaman J, et al. What  
356 factors might have led to the emergence of Ebola in West Africa? *PLoS Negl Trop Dis*  
357 (2015) 9:e0003652. doi:10.1371/journal.pntd.0003652  
358 49. Moon S, Sridhar D, Pate MA, Jha AK, Clinton C, Delaunay S, et al. Will Ebola change  
359 the game? Ten essential reforms before the next pandemic. The report of the Harvard-  
360 LSHTM Independent Panel on the Global Response to Ebola. *Lancet* (2015) 386:2204-21.  
361 50. Kagina BM, Wiysonge CS, Lesosky M, Madhi SA, Hussey GD. Safety of licensed  
362 vaccines in HIV-infected persons: a systematic review protocol. *Syst Rev* (2014) 3:101. doi:  
363 10.1186/2046-4053-3-101

364 **Figure legends**

365

**Figure 1**

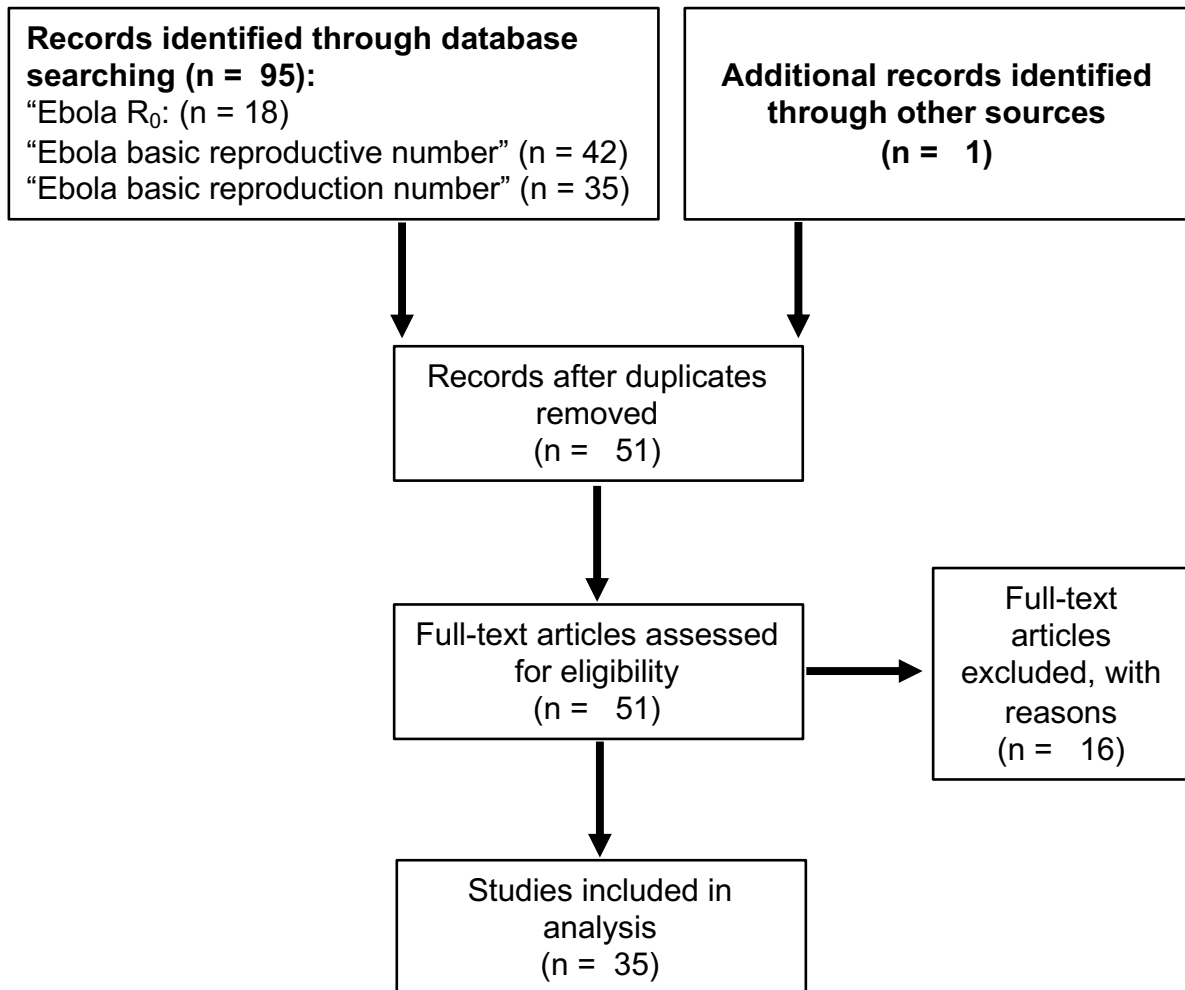

366

367

368 **Figure 1.** Summary of the literature search using PubMed ([www.ncbi.nlm.nih.gov/pubmed](http://www.ncbi.nlm.nih.gov/pubmed))

369 to identify articles that report on the basic reproductive number ( $R_0$ ) of Ebolaviruses.

370

371

372

**Figure 2**

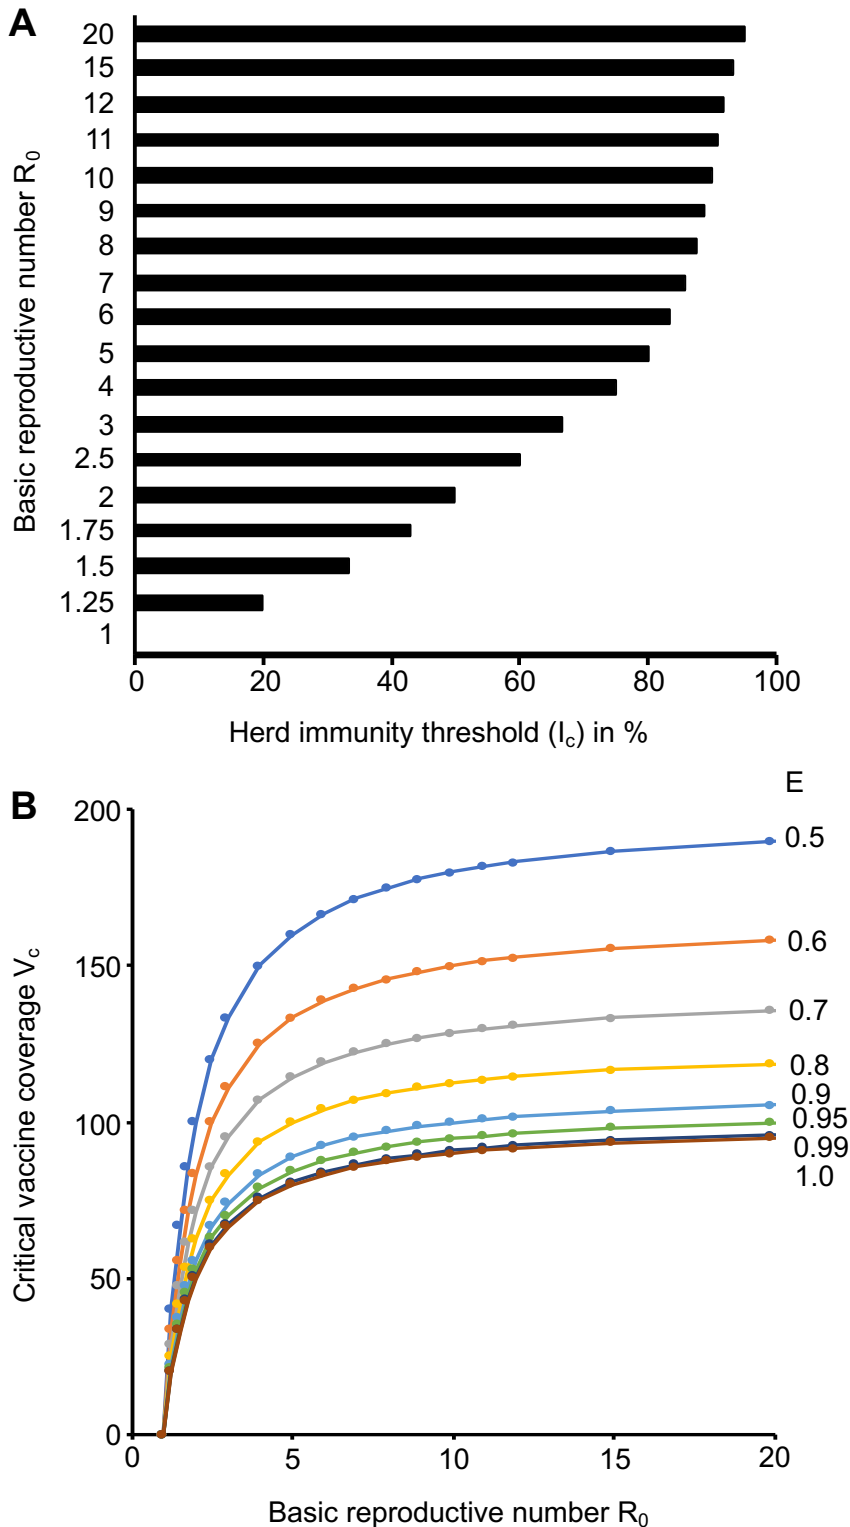

373  
 374 **Figure 2.** Herd immunity thresholds ( $I_c$ ) and Critical vaccine coverage ( $V_c$ ) values in  
 375 dependence of the basic reproductive number ( $R_0$ ) and the vaccine efficacy ( $E$ ). A)  $I_c$  values  
 376 based on a range of  $R_0$  values that cover the range reported for Ebolaviruses. B)  $V_c$  values  
 377 based on  $R_0$  values that cover the range reported for Ebolaviruses and  $E$  values that are in the  
 378 range of those reported for approved vaccines. The respective numerical data are presented in  
 379 Data Sheet 3.
